# Supplementary material for: High-resolution ice thickness and bed topography of a land-terminating section of the Greenland Ice Sheet
Source: Copernicus journal article supplement (doi:10.5194/essd-6-331-2014), 2014-09-25
Supplement: Supplementary file 1 [file supplement-cover-letter.pdf › supplement-cover-letter.pdf]

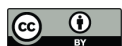

## *Supplement of*

# **High-resolution ice thickness and bed topography of a land-terminating section of the Greenland Ice Sheet**

**K. Lindbäck et al.**

*Correspondence to:* K. Lindbäck ([katrin.lindback@geo.uu.se](mailto:katrin.lindback@geo.uu.se))

- Supplement-Cover-Letter.pdf
- Supplement1.jpg
- Supplement2.jpg
- Supplement3.jpg
- Supplement4.jpg
